# Supplementary material for: EphA2- and HDAC-Targeted Combination Therapy in Endometrial Cancer
Source: MDPI journal article supplement (doi:10.3390/ijms25021278), 2024-01-20

# Supplemental figure S1

A

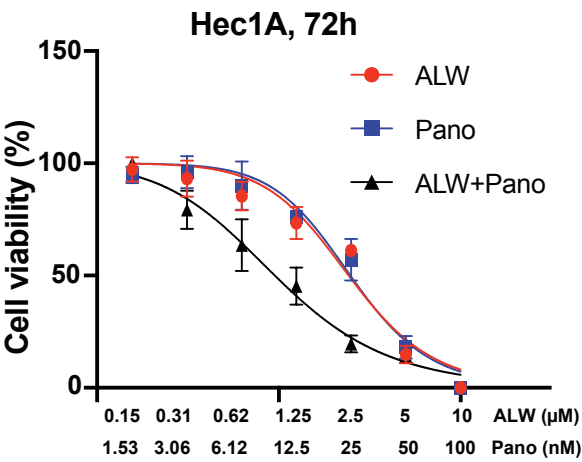

B

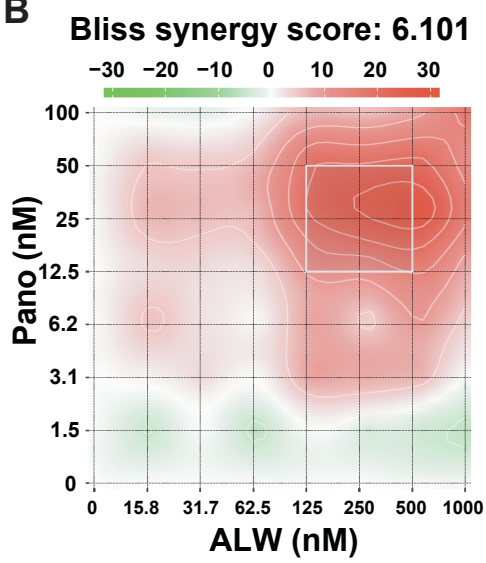

C

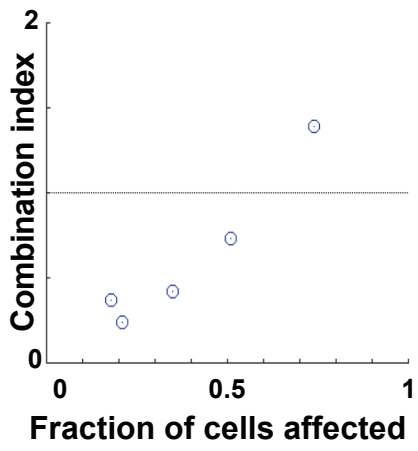

## Supplemental figure S2

**A**

**Ishikawa**

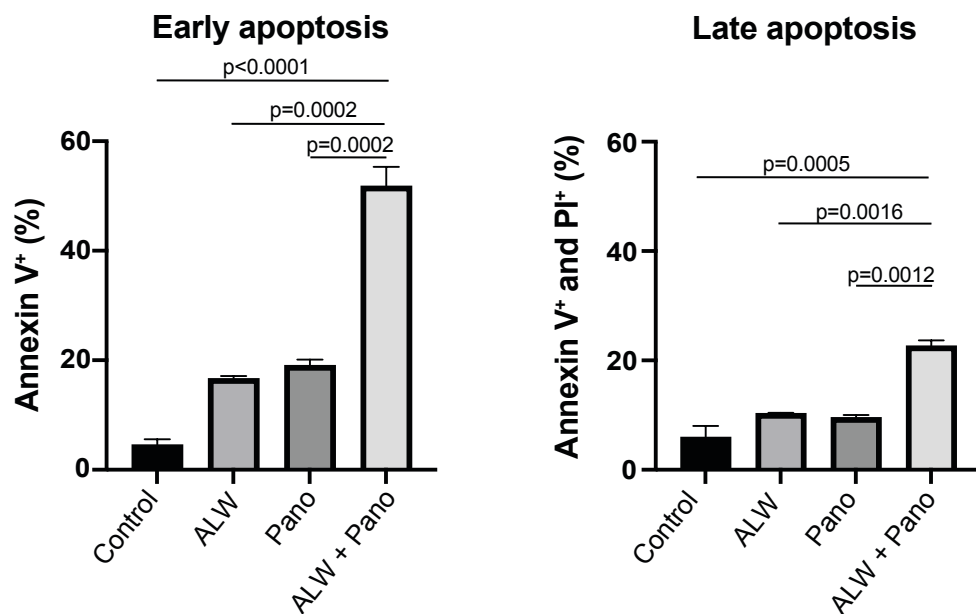

**B**

**Hec1A**

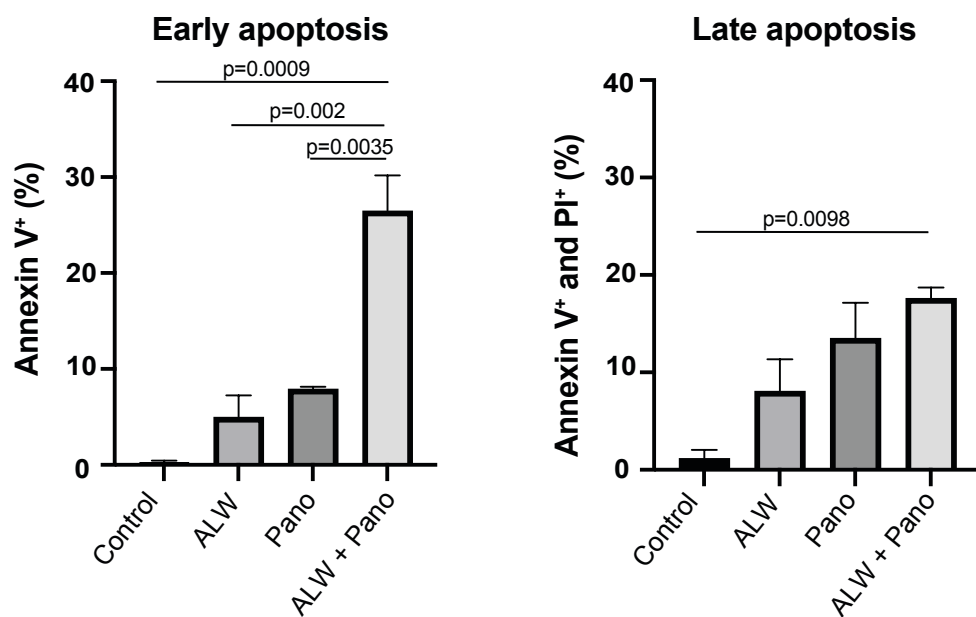

**C**

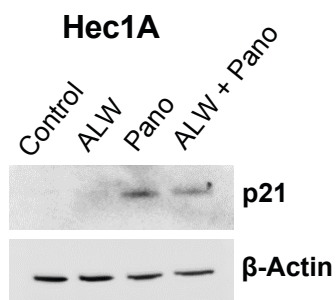

## Supplemental figure S3

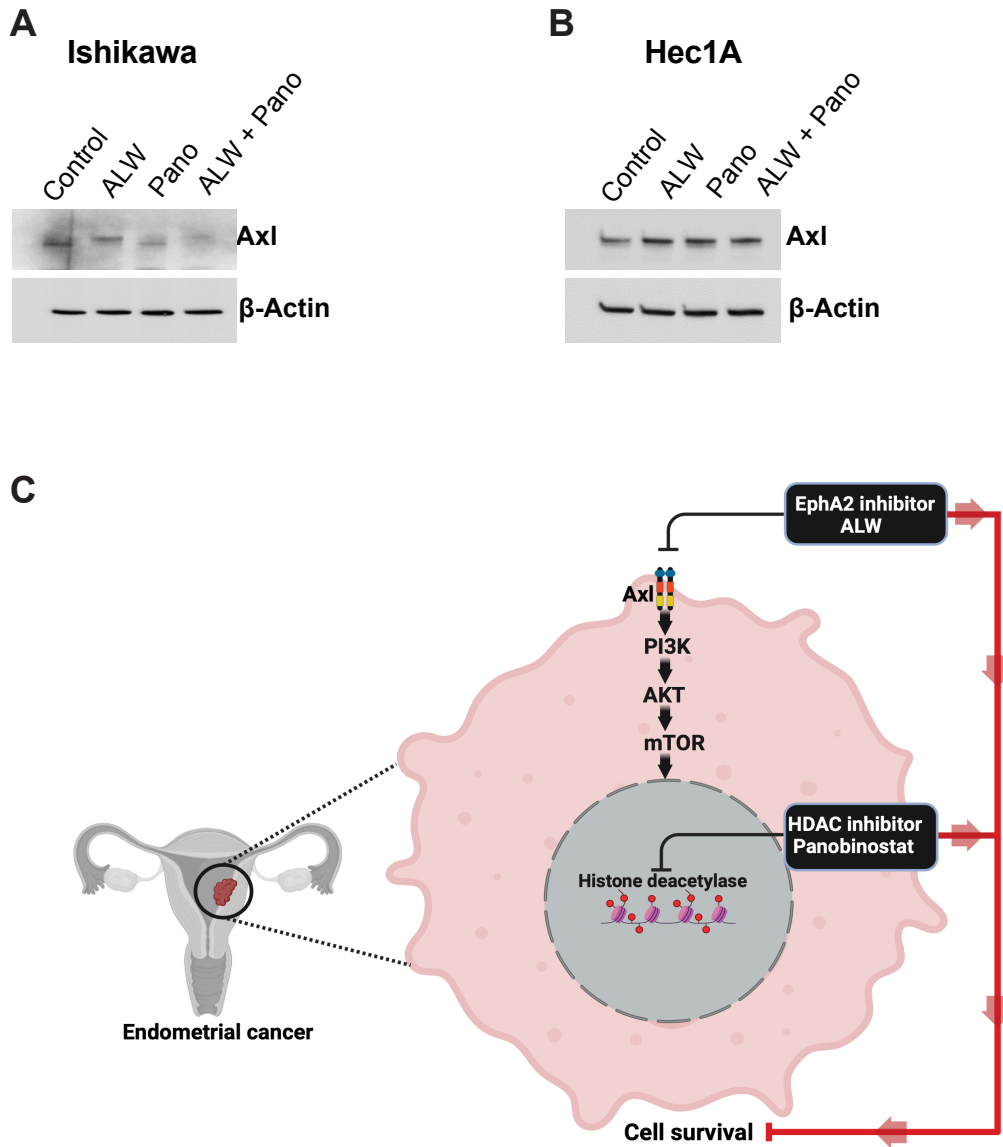

Supplemental figure S4

Relative density associated with Figure 2

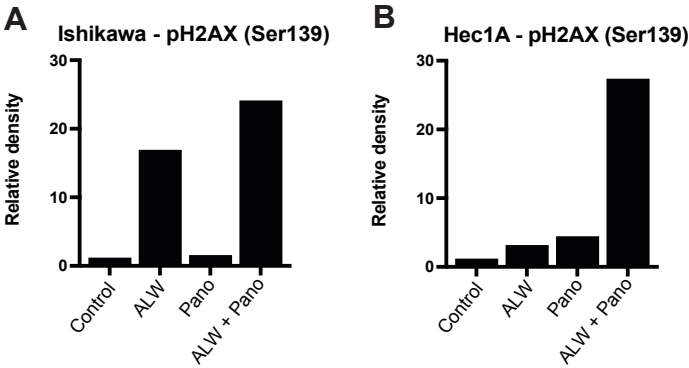

Relative density associated with Figure 4

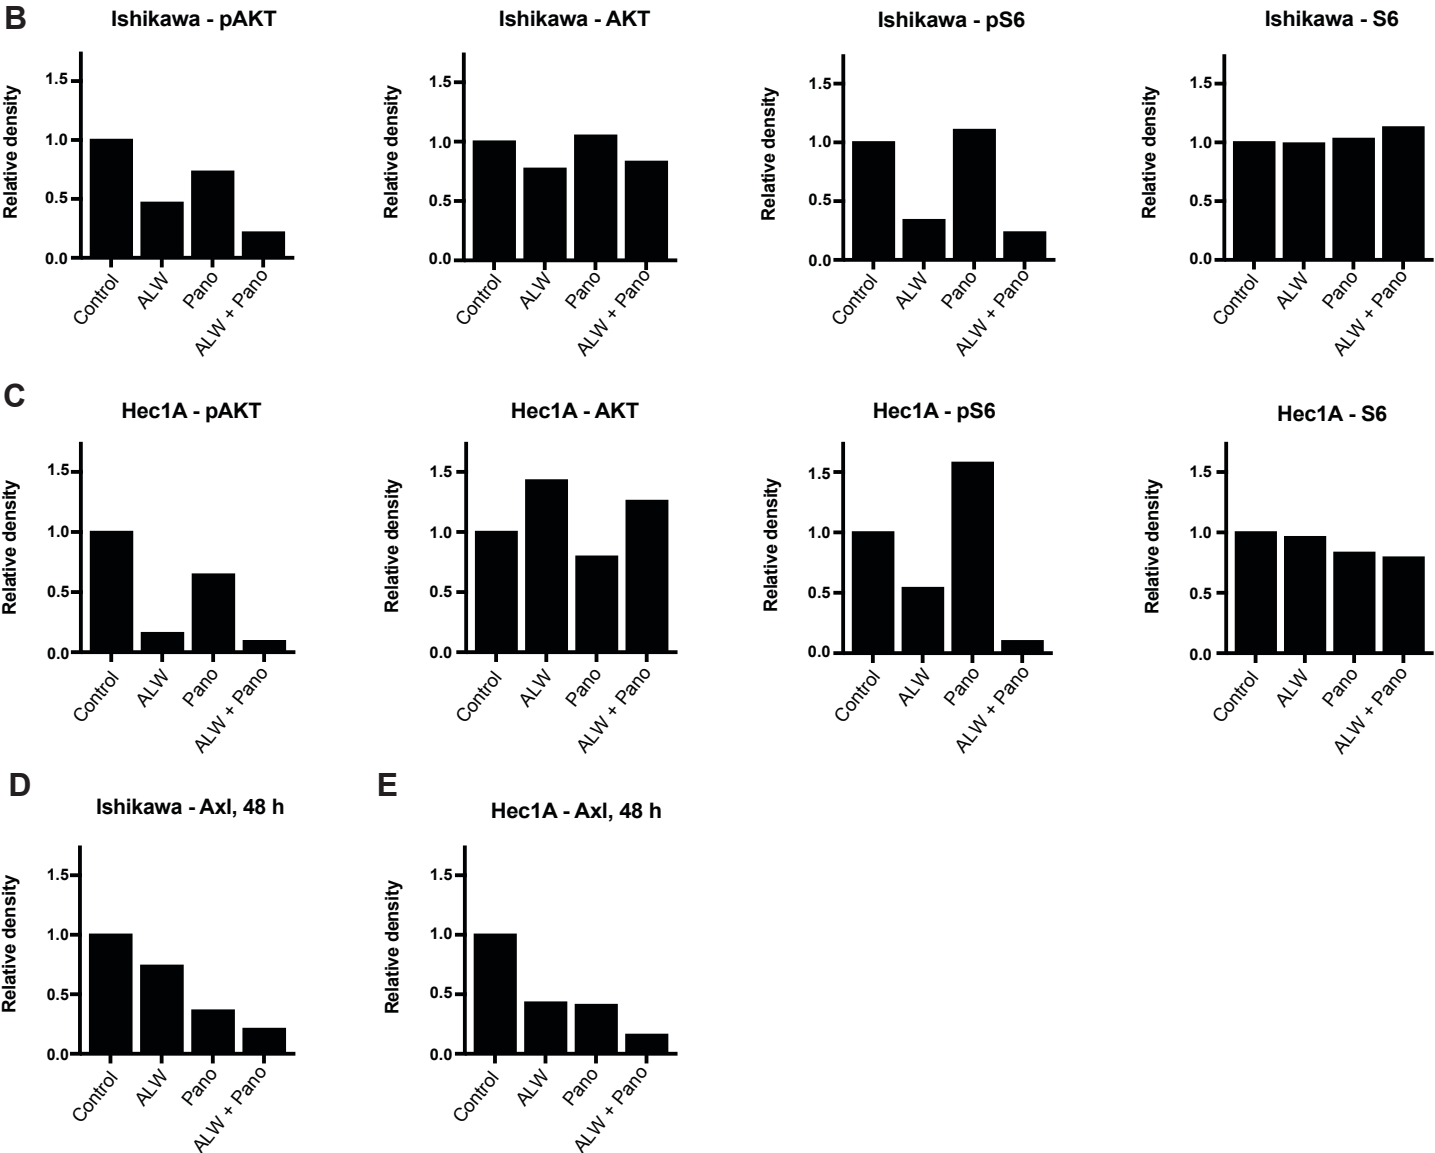

Relative density associated with Supplemental figures

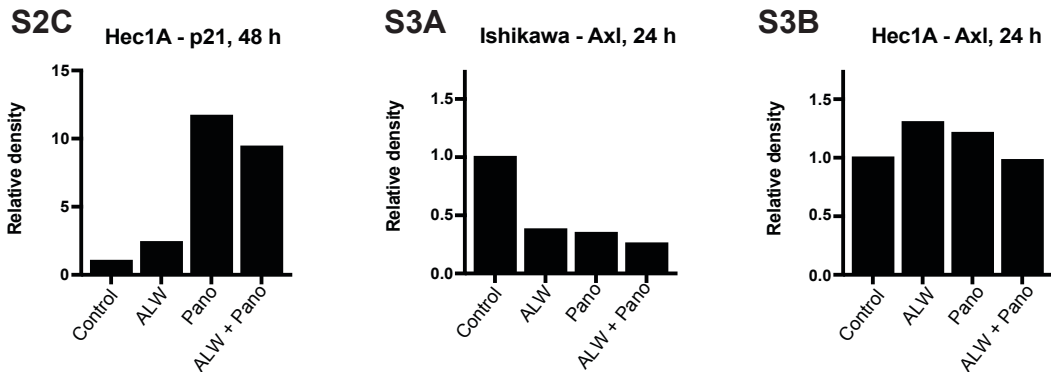

Supplement: s1 [file s1]
